# Supplementary material
Source: PubMed Central journal article supplement (PMC3833083)

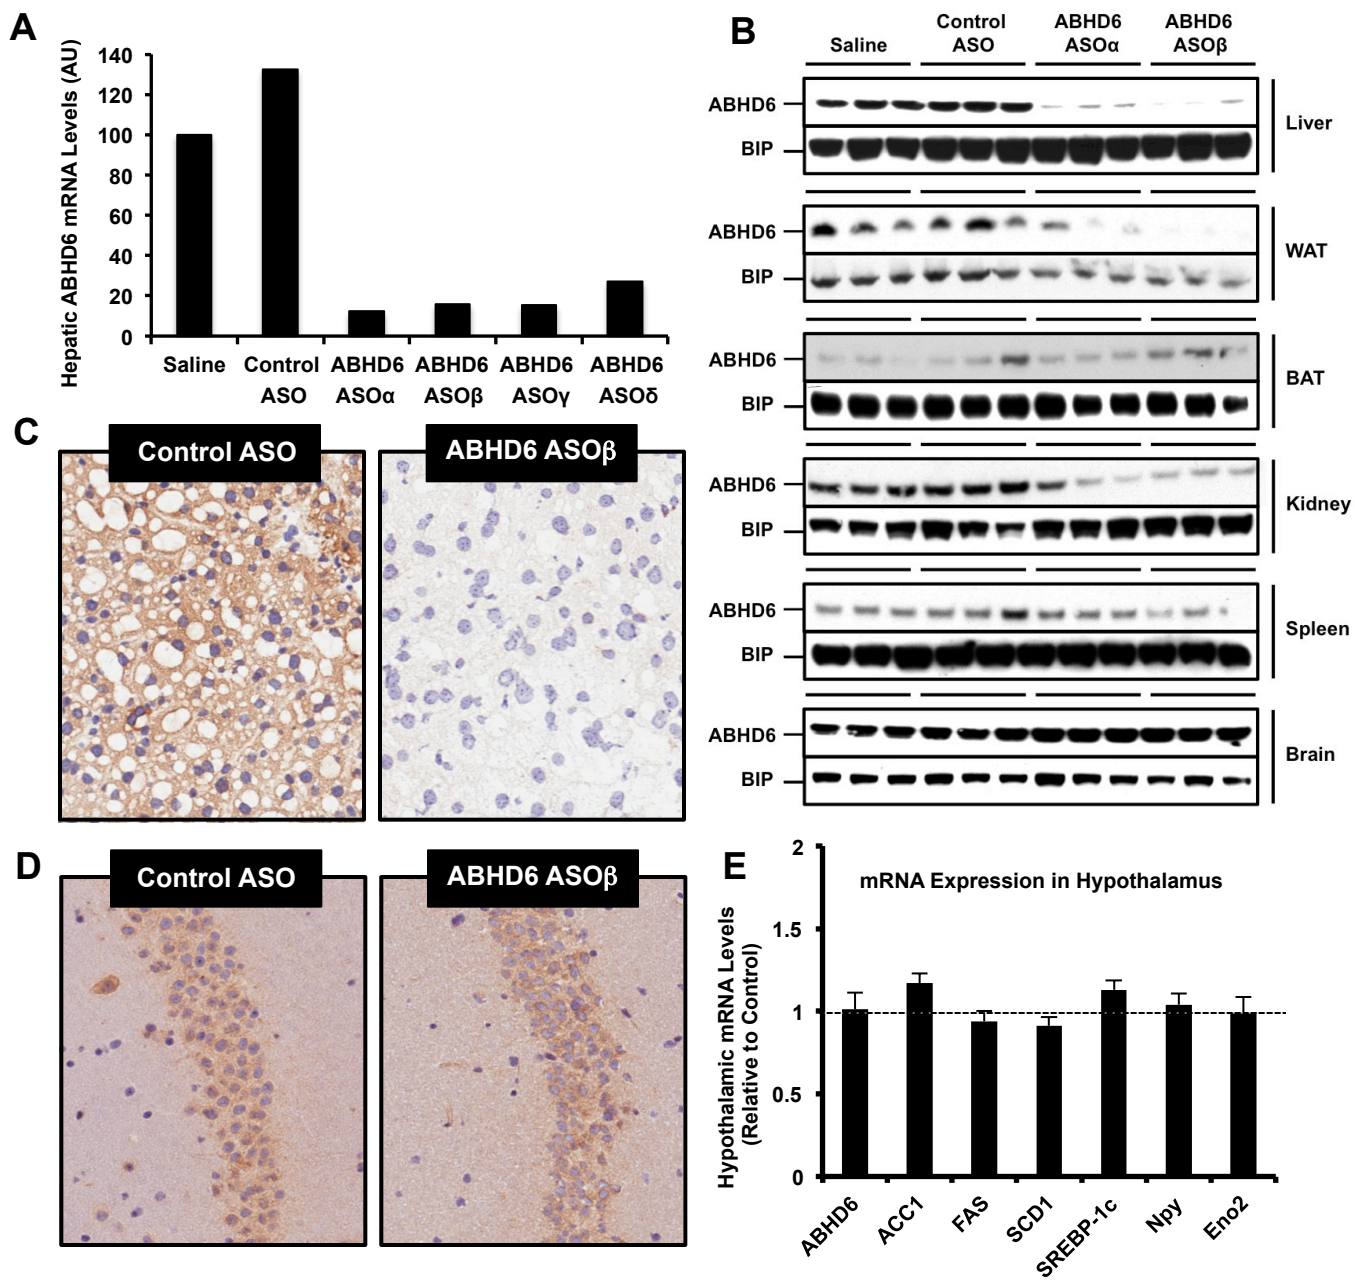

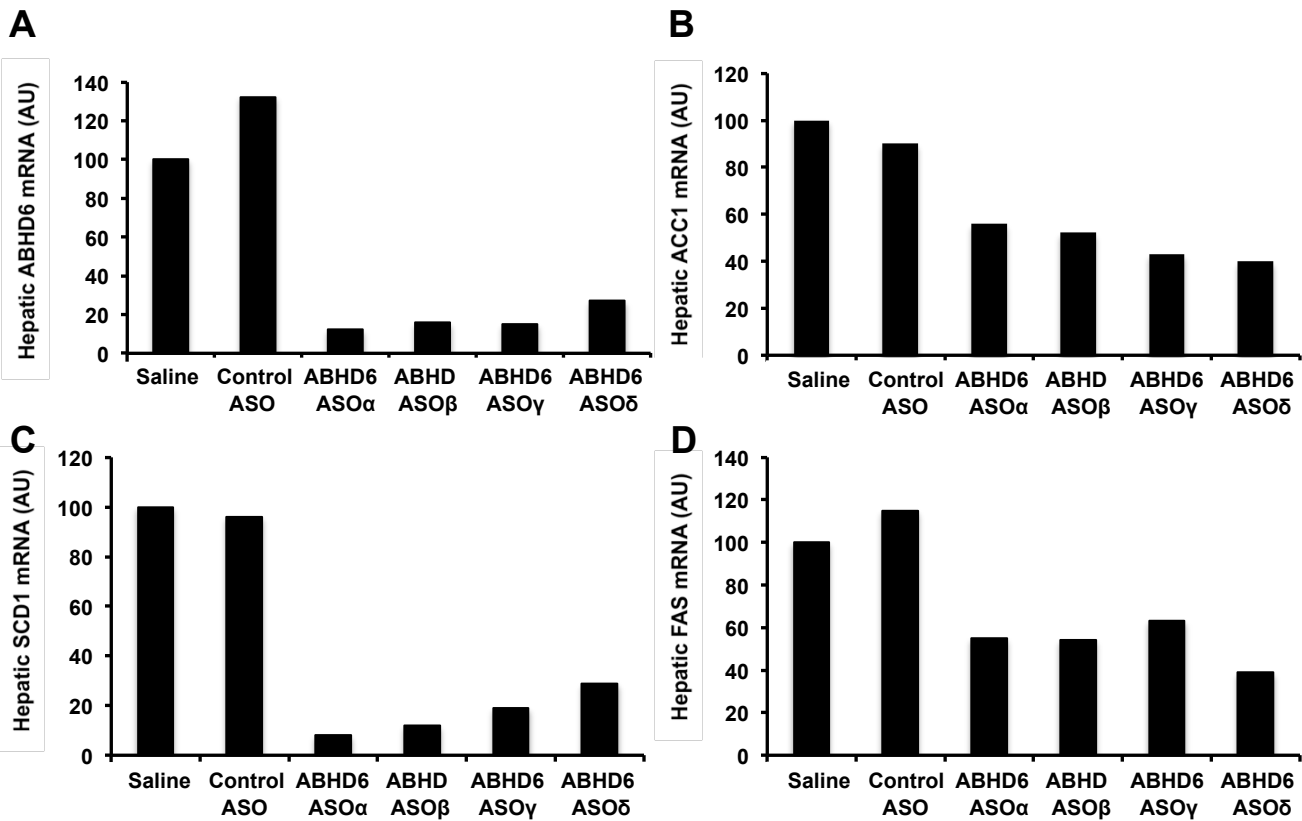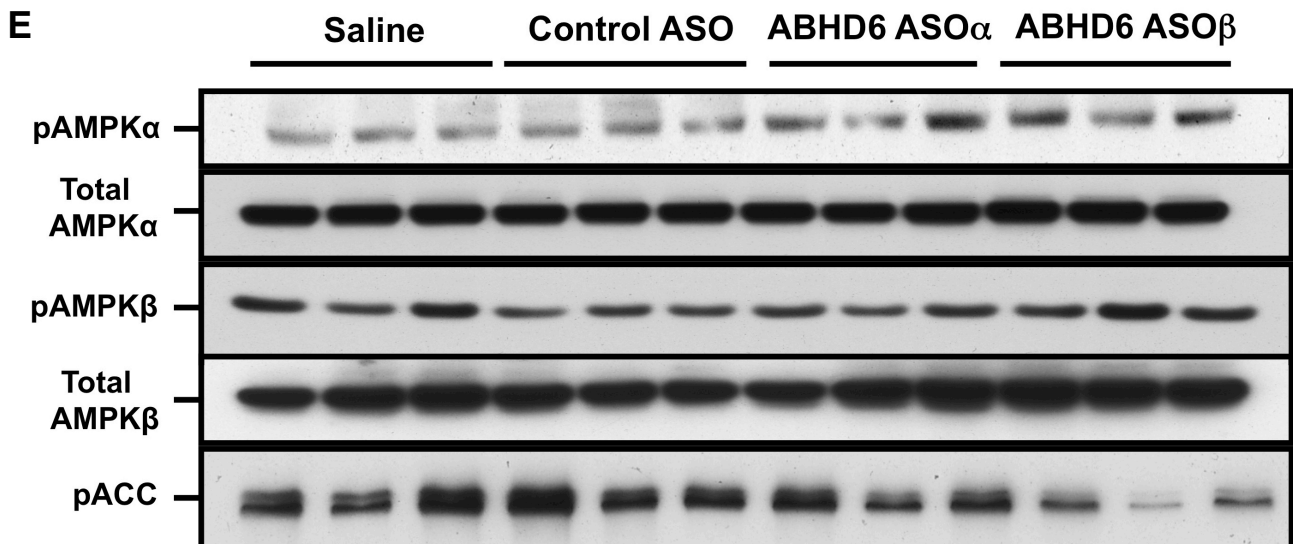

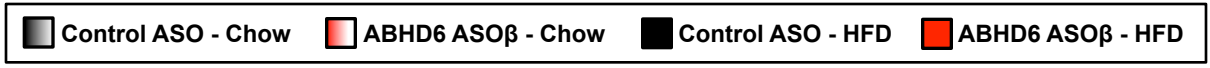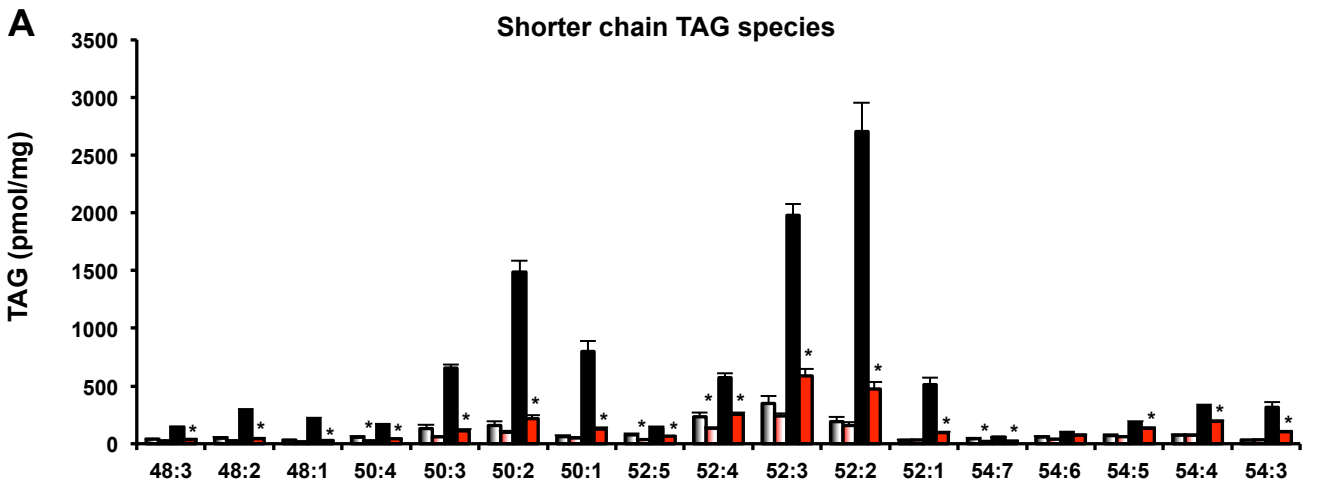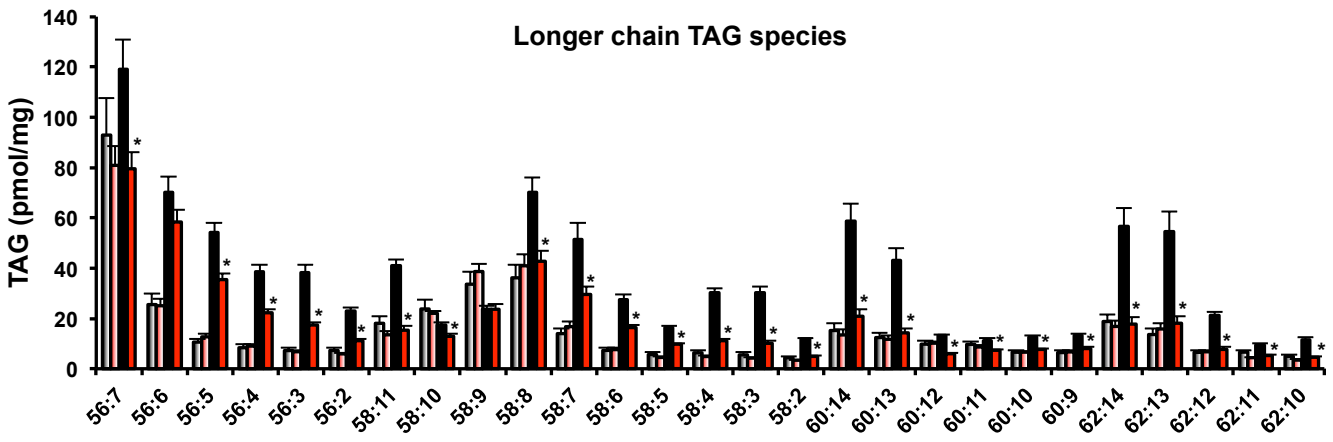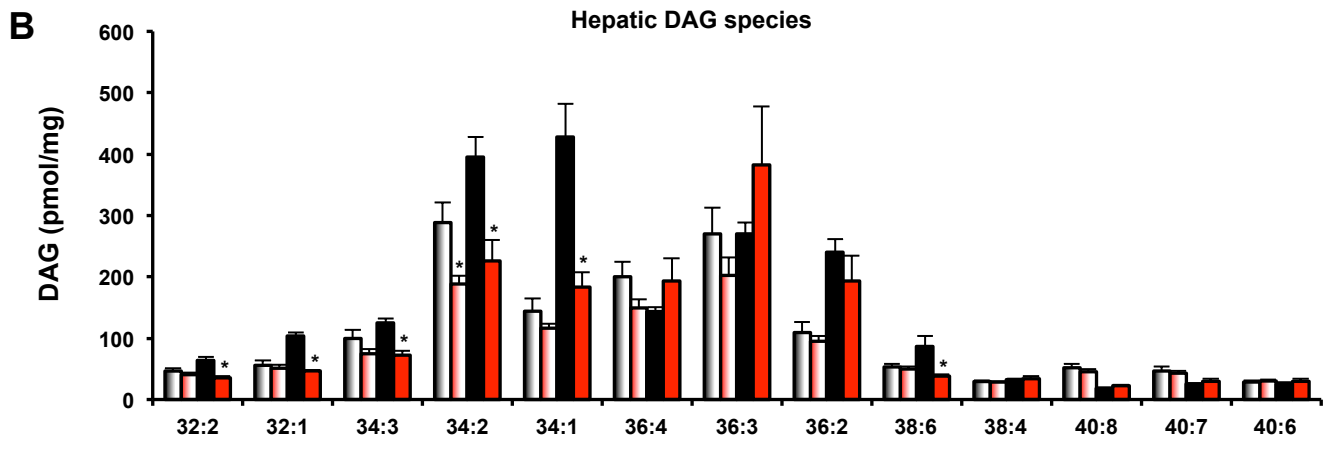

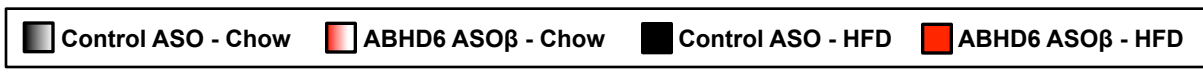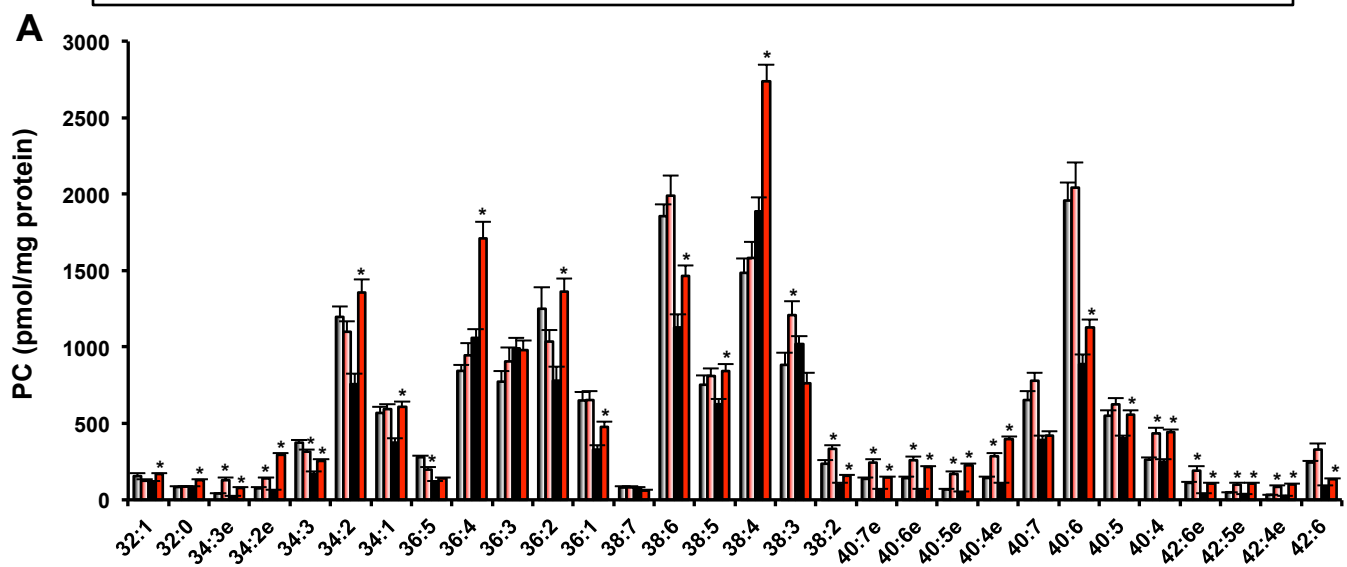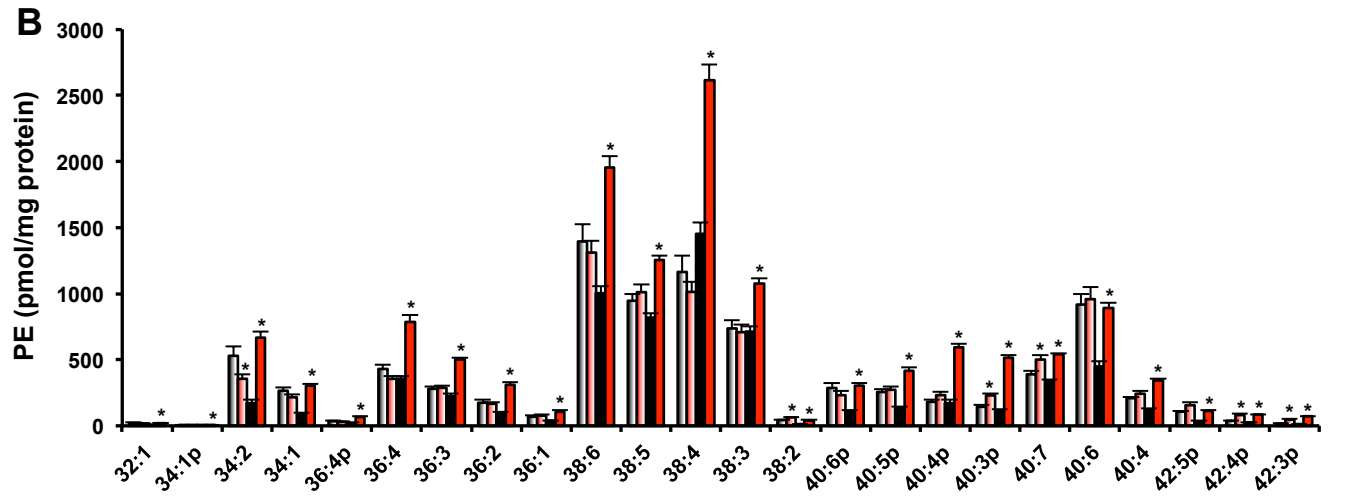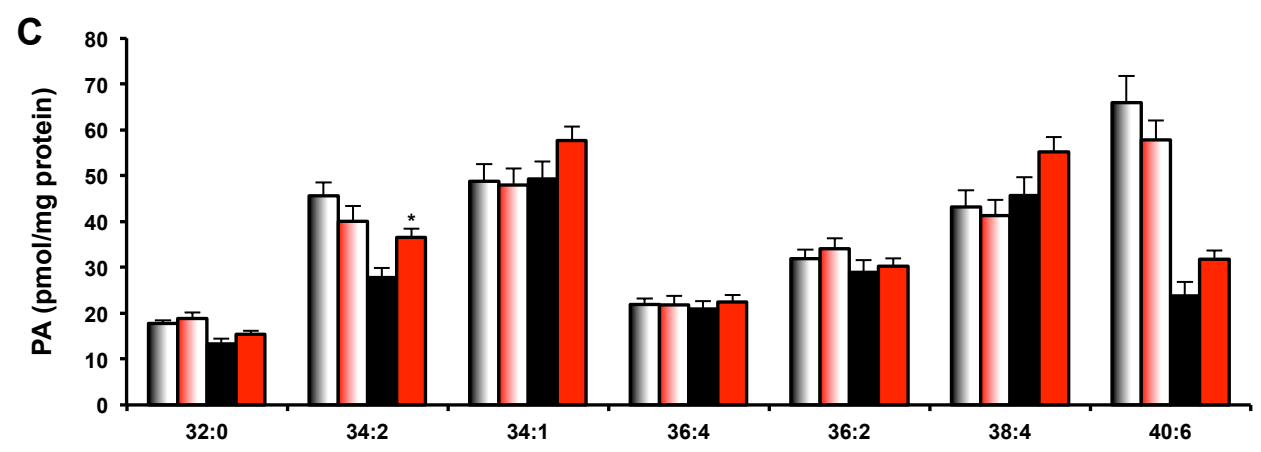

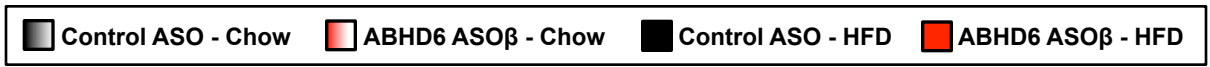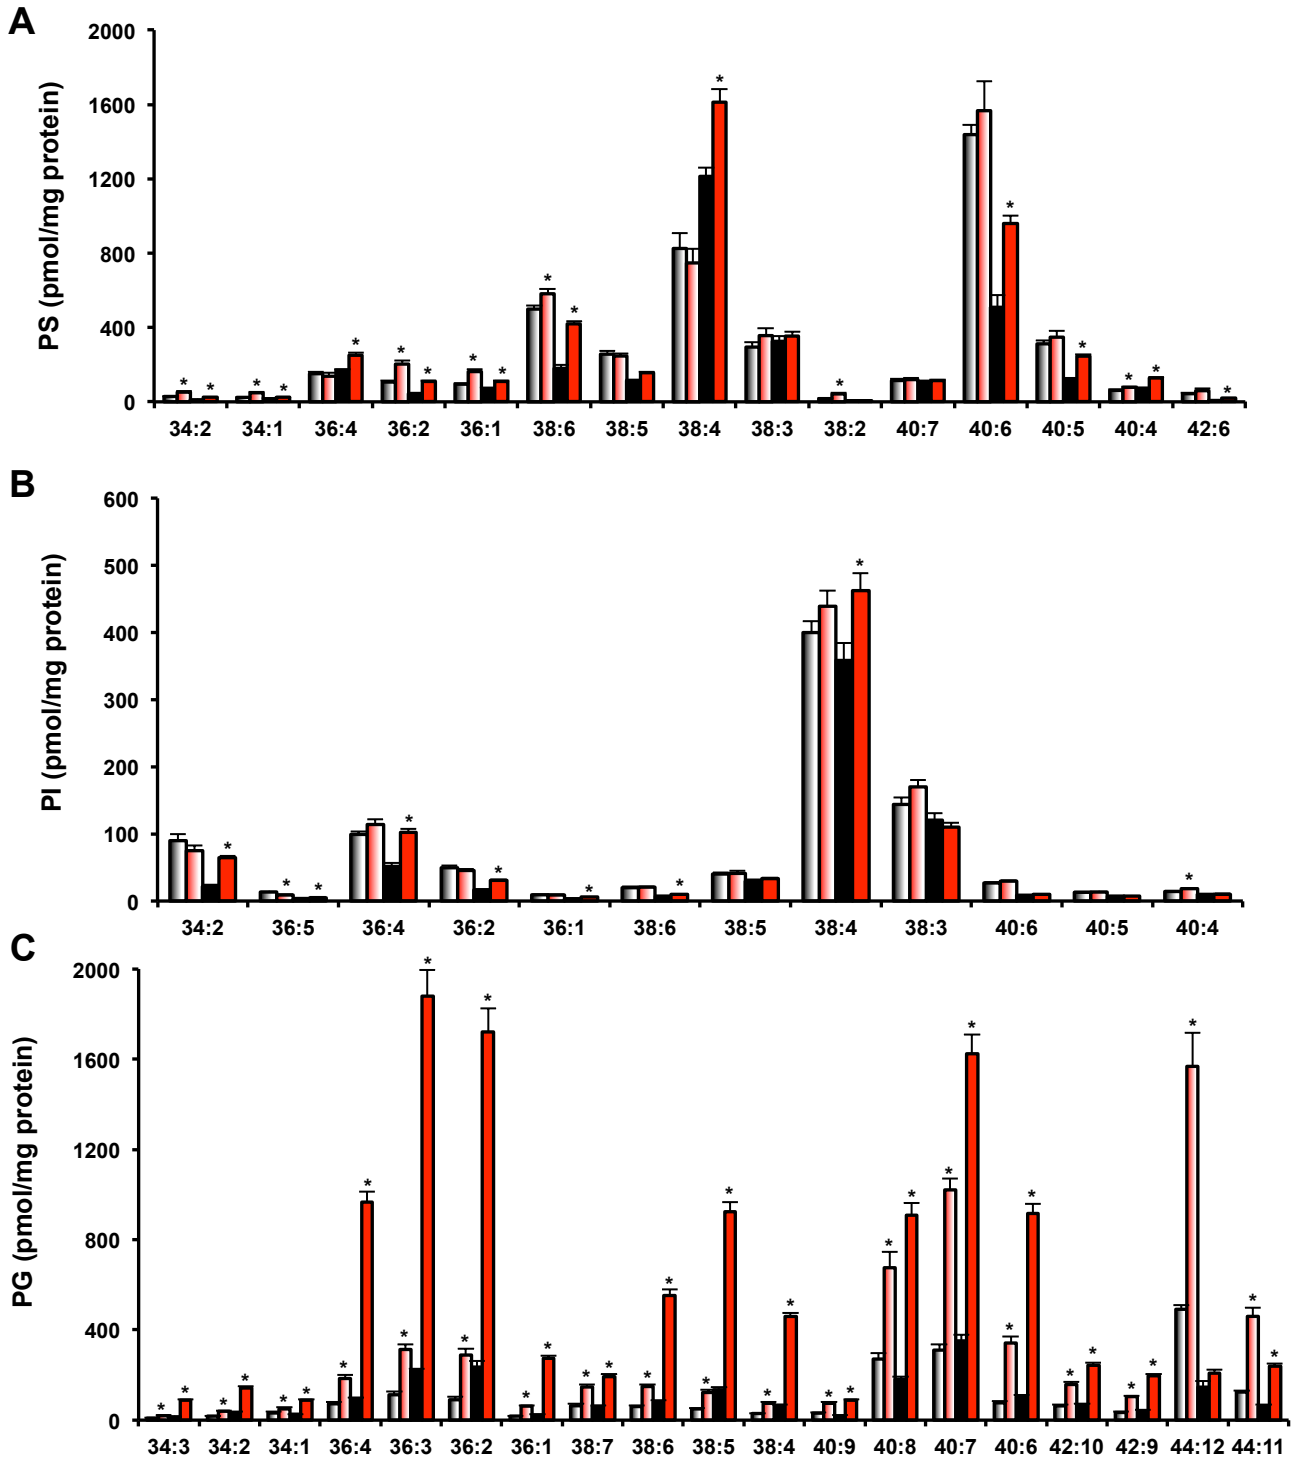

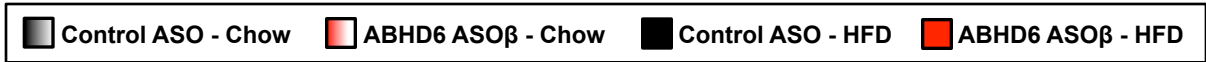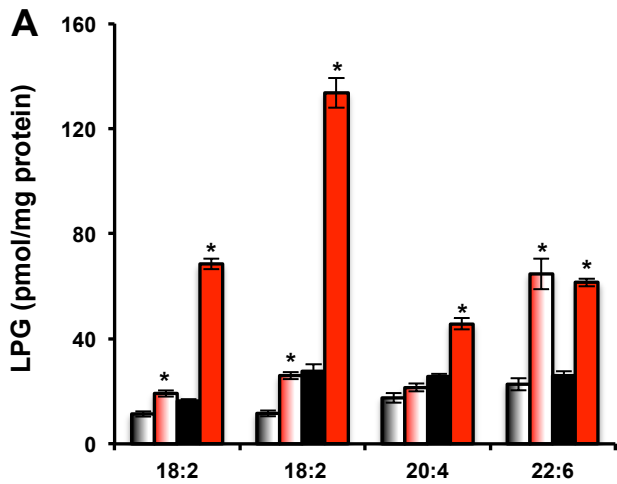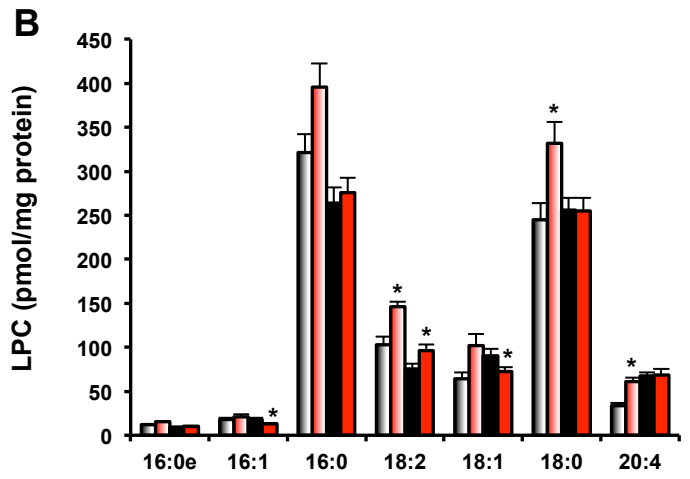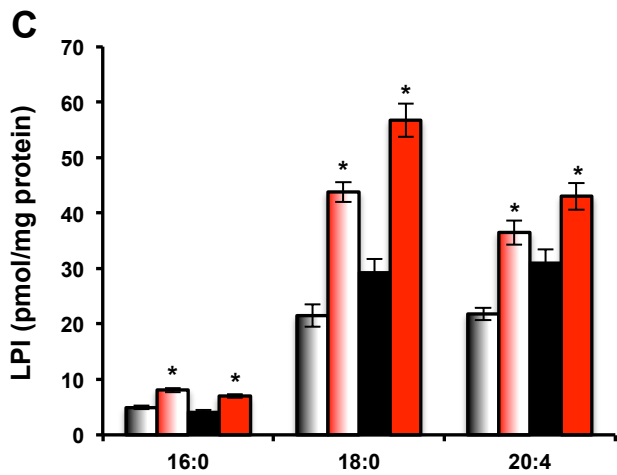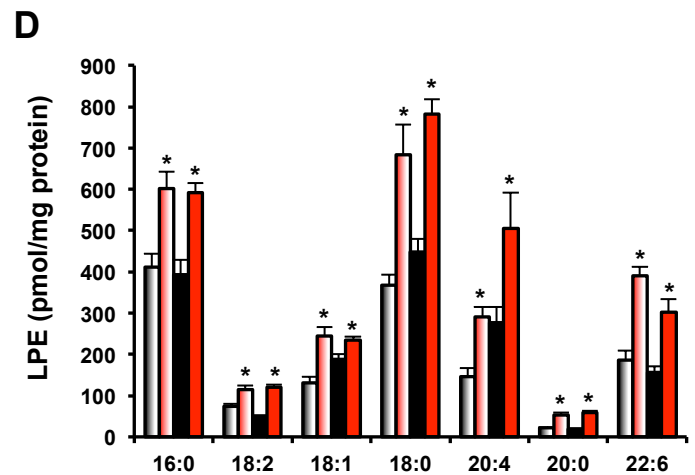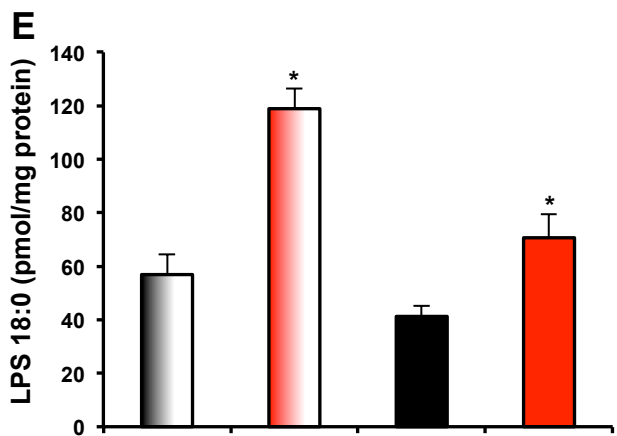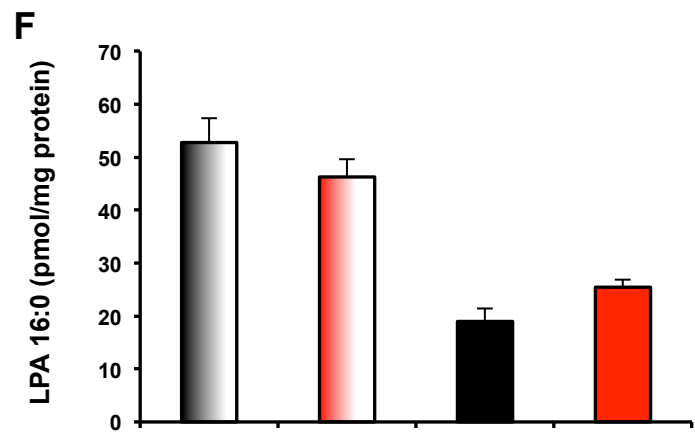

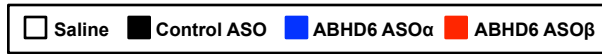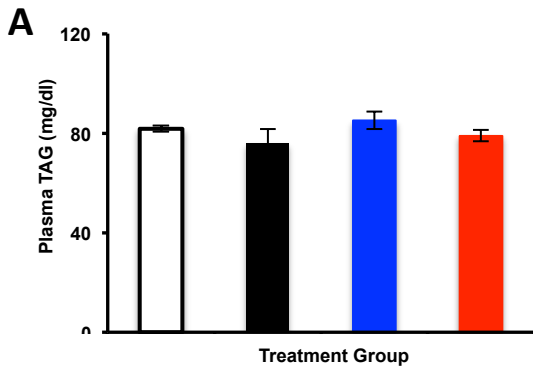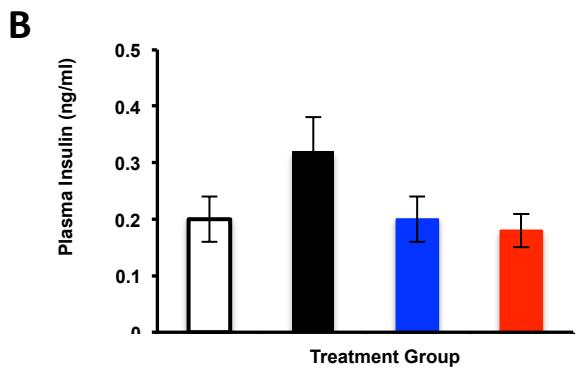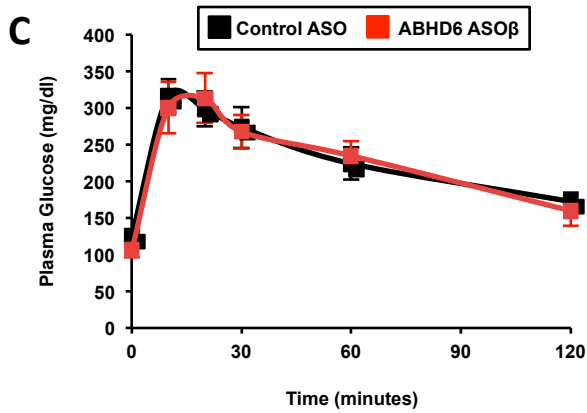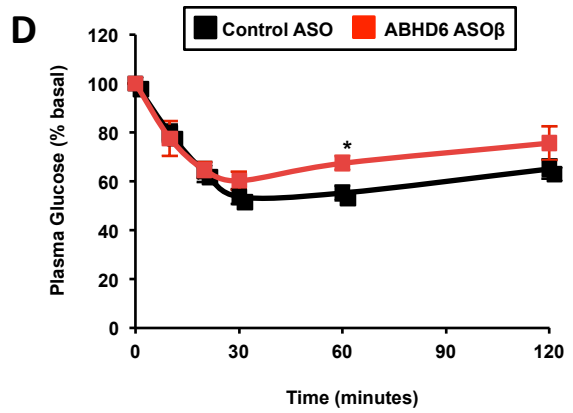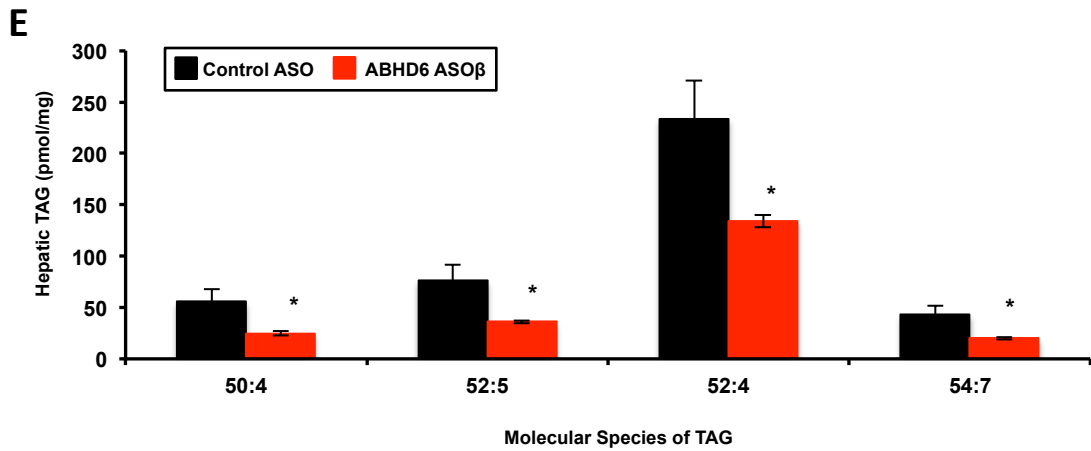

Supplement: NIHMS525242-supplement-02.pdf [file NIHMS525242-supplement-02.pdf]
